# Supplementary material for: Development of whole-cell and cell-free biosensors for the detection and differentiation of organic and inorganic forms of copper
Source: Royal Society of Chemistry journal article supplement (doi:10.1039/d0mt00146e), 2020-09-30
Supplement: d0mt00146e1.pdf [file d0mt00146e1.pdf]

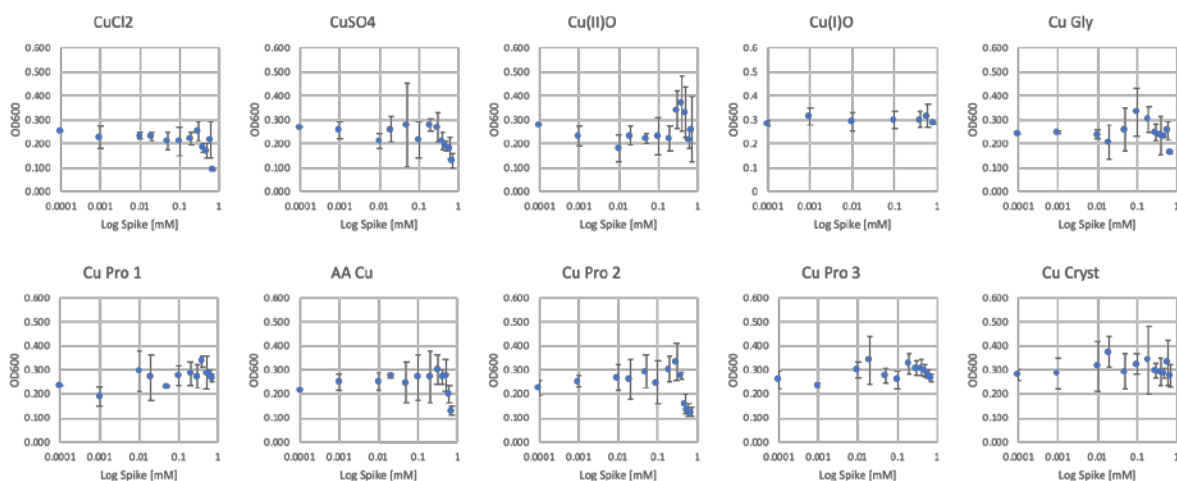

**Sup. Fig. 1 | Culture growth with metal spike.** The optical density of cultures at 600nm (OD<sub>600</sub>) is plotted with respect to copper spike [mM]. Datapoints represent the mean of three experiments run on different days with error displayed as the standard deviation of the three experiments.
